# Supplementary material for: Three-dimensional chromatin reorganization regulates B cell development during ageing
Source: PubMed Central journal article supplement (PMC11178499; doi:10.1038/s41556-024-01424-9), 2024-06-12
Supplement: 41556_2024_1424_MOESM1_ESM.pdf [file 41556_2024_1424_MOESM1_ESM.pdf]

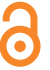

---

# Three-dimensional chromatin reorganization regulates B cell development during ageing

---

In the format provided by the authors and unedited

---

Gating strategy of Extended Figure 1a.

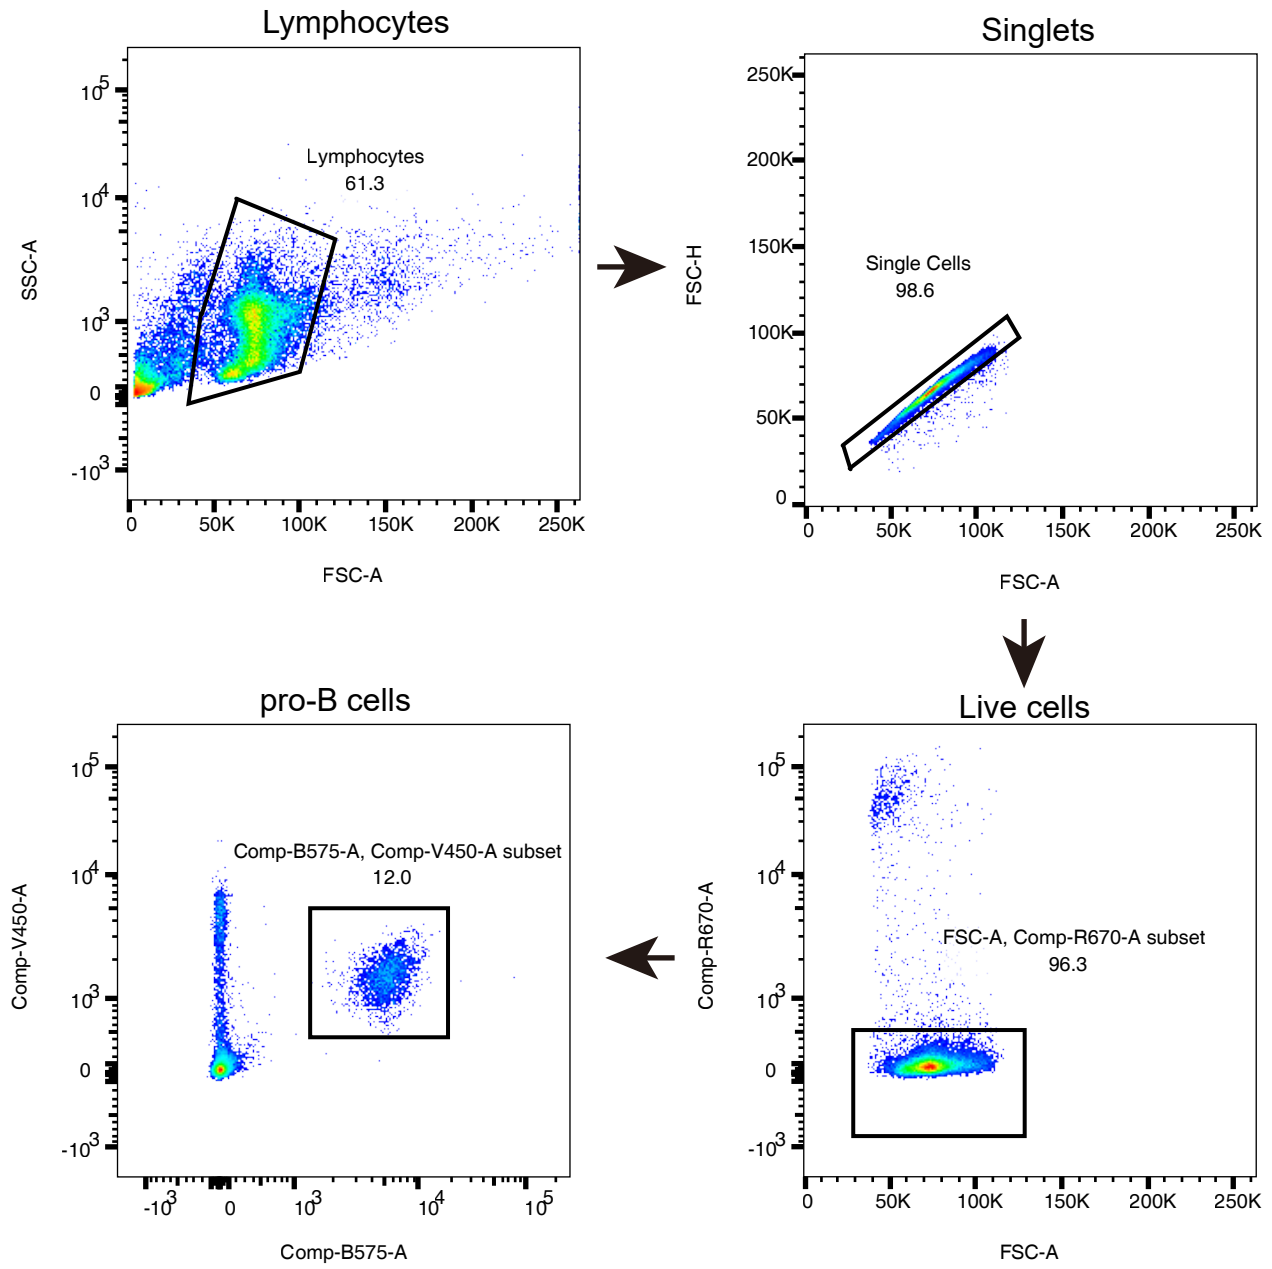

One young *Rag2*<sup>-/-</sup> mouse shown as the example.
